# Supplementary material
Source: PubMed Central journal article supplement (PMC2397294)
Supplement: E07-07-0720_1.pdf [file E07-07-0720_1.pdf]

## E07-07-0720 Chambers

**Supplementary Data Figure 1. Q94 displaces the high affinity binding peptide MBP-T2-14 from activated PAR<sub>1</sub> and blocks thrombin induced Ca<sup>2+</sup> transients in HEK293 cells.** For the binding studies (left panel) PAR<sub>1</sub> receptors expressed in membranes of SF9 cells were treated with [100 nM] TRAP. Purified T2-14 fused with *E. coli* maltose binding protein (MBP-T2-14)[100 nM] was added to wells and allowed to bind to the receptor. Increasing amounts of Q94 were added to wells in triplicate, binding of MBP-T2-14 was measured using an ELISA for MBP. Data presented are the mean of individual wells from 3 separate experiments. A non-linear regression analysis was generated using GraphPad Prism, version 5.0. For the Ca<sup>2+</sup> transient studies (right panel), assays were performed using Molecular Devices Calcium Plus Assay Kit according to the manufacturer's protocol. HEK cells were seeded overnight at 50,000 cells/100 μl/well in 96-well plates coated with poly-D-lysine. Probenecid was made fresh and added to the loading buffer (2.5 mM final). Compound dilutions were added to the wells and allowed to incubate at 37°C, with 5% CO<sub>2</sub> for 1 hr, after which 100 μl of loading dye was added and the plate incubated at 37°C, with 5% CO<sub>2</sub> for 1 hour. The parameters were an excitation wavelength of 485nm, and an emission wavelength of 525 nm. Basal conditions were established and basal fluorescence (F<sub>B</sub>) recorded before addition of agonist (TRAP; 5μM). Subsequently, fluorescence readings (F<sub>S</sub>) were taken every 2 seconds for 190 seconds. Data presented are the mean (F<sub>S</sub>-F<sub>B</sub>) of 3 individually recorded wells. Results were quantified and averaged using GraphPad Prism, Version 5.0.

## Supplementary Figure 1

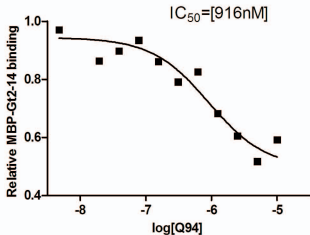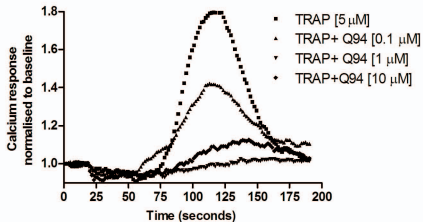

## Supplementary data

### Selection screen criteria for Q94

The novel PAR<sub>1</sub> antagonist, Q94, is a small molecule (MW<500) that meets the Lipinski rule of five. The compound was chosen on the basis of its ability to compete for binding at the carboxyl-terminus of PAR<sub>1</sub>, with a high affinity receptor binding peptide probe (HABP) designed around the 11 amino acids found at the carboxyl-terminus of Gαq. The HABP probe (T2-14) was selected from a proprietary library of Gαq related peptides, constructed by sequential substitution of the 11 native C-terminal amino acids with each of the 20 known amino acids. This was fused with *E. coli* maltose binding protein (MBP-T2-14), to enable recognition by MBP ELISA. IC<sub>50</sub> values for binding of the HABPs to the receptor carboxyl-terminus showed that MBP-T2-14 actually had a higher binding affinity for PAR<sub>1</sub> than native Gαq C-terminal peptide. The selective nature of the MBP-T2-14 for PAR<sub>1</sub> was supported by the fact that both a β2AR-x probe (which contains a sequence obtained from screening the activated β2-adrenergic receptor with a Gαs library), and RHO8 probe (identified from a Gαt library for its ability to bind activated Rhodopsin) showed little or no binding affinity for PAR<sub>1</sub>. Q94 was found to compete off the highly selective MBP-T2-14, from activated PAR<sub>1</sub> receptors with an IC<sub>50</sub> of 916nM (Supplementary Figure 1, left panel). Additionally, this compound was found to effectively inhibit thrombin receptor activating peptide (TRAP) induced calcium transients (Supplementary data, Figure 1, right panel).

| HABP       | C-terminal sequence   | IC50 [nM] |
|------------|-----------------------|-----------|
| MBP-Gq     | L Q L N L K E Y N L V | 320       |
| MBP-T2-14  | L Q L N L K x Y N x V | 106       |
| MBP-B2AR-x | Q R x H L R x Y E x L | 8277      |
| MBP-RHO-8  | L L E N L R D C G M F | 8411      |

**Table I. IC<sub>50</sub> Values for high affinity C-terminal PAR<sub>1</sub> receptor binding proteins.** Using competitive ELISA the affinity of selected purified MBP-C-terminal fusion proteins for activated PAR<sub>1</sub> were determined. β2AR-x contains a sequence obtained from screening the activated β2-adrenergic receptor with a Gαs library, and there is either no binding or very low-affinity binding. There is also little or no binding with RHO8, a peptide identified from a Gαt library for its ability to bind activated Rhodopsin. This supports the selective nature of the binding of peptide sequences to PAR<sub>1</sub>. The curves were generated and IC<sub>50</sub> values were derived by fitting the dose-response curves with a non-linear regression program. The position of substituted amino acids in proprietary peptide sequences are marked x.

**Supplementary Data Figure 1. Q94 displaces the high affinity binding peptide MBP-T2-14 from activated PAR<sub>1</sub> and blocks thrombin induced Ca<sup>2+</sup> transients in HEK293 cells.** For the binding studies (left panel) PAR<sub>1</sub> receptors expressed in membranes of SF9 cells were treated with [100 nM] TRAP. Purified T2-14 fused with *E. coli* maltose binding protein (MBP-T2-14)[100 nM] was added to wells and allowed to bind to the receptor. Increasing amounts of Q94 were added to wells in triplicate, binding of MBP-T2-14 was measured using an ELISA for MBP. Data presented are the mean of individual wells from 3 separate experiments. A non-linear regression analysis was generated using GraphPad Prism, version 5.0. For the Ca<sup>2+</sup> transient studies (right panel), assays were performed using Molecular Devices Calcium Plus Assay Kit according to the manufacturer's protocol. HEK cells were seeded overnight at 50,000 cells/100 μl/well in 96-well plates coated with poly-D-lysine. Probenecid was made fresh and added to the loading buffer (2.5 mM final). Compound dilutions were added to the wells and allowed to incubate at 37°C, with 5% CO<sub>2</sub> for 1 hr, after which 100 μl of loading dye was added and the plate incubated at 37°C, with 5% CO<sub>2</sub> for 1 hour. The parameters were an excitation wavelength of 485nm, and an emission wavelength of 525 nm. Basal conditions were established and basal fluorescence (F<sub>B</sub>) recorded before addition of agonist (TRAP; 5μM). Subsequently, fluorescence readings (F<sub>S</sub>) were taken every 2 seconds for 190 seconds. Data presented are the mean (F<sub>S</sub>-F<sub>B</sub>) of 3 individually recorded wells. Results were quantified and averaged using GraphPad Prism, Version 5.0.
